# Supplementary material
Source: ML conference proceedings conference paper supplement (https://proceedings.mlr.press/v97/han19b.html)
Supplement: Supplementary file [file han19b-supp.pdf]

## A. Hyperparameter Setting and Environment Description

The hyperparameters for simple PPO, PPO-AMBER, and DISC are summarized in Table A.1, and the dimensions of state and action spaces of Open AI GYM tasks are given in Table A.2.

|                                               | PPO                                                                                | PPO-AMBER                                | DISC     |
|-----------------------------------------------|------------------------------------------------------------------------------------|------------------------------------------|----------|
| Clipping factor ( $\epsilon$ )                | 0.2                                                                                | 0.2                                      | 0.4      |
| Horizon ( $N$ )                               | 2048                                                                               | 2048                                     | 2048     |
| Discount factor ( $\gamma$ )                  | 0.99                                                                               | 0.99                                     | 0.99     |
| TD parameter ( $\lambda$ )                    | 0.95                                                                               | 0.95                                     | 0.95     |
| Epoch                                         | 10                                                                                 | 10                                       | 10       |
| Gradient steps per epoch                      | 32                                                                                 | 32                                       | 32       |
| Mini-batch size ( $M$ )                       | 64                                                                                 | variable                                 | variable |
| Optimizer                                     | Adam                                                                               | Adam                                     | Adam     |
| Learning rate ( $\beta$ )                     |                                                                                    | $\max(0.0001, \text{Anneal}(0.0003, 0))$ |          |
| Policy distribution                           |                                                                                    | Independent Gaussian distribution        |          |
| Policy and value network                      | Feed forward network with 2 hidden layers of size 64 and $\tanh(\cdot)$ activation |                                          |          |
| Batch inclusion parameter ( $\epsilon_b$ )    | .                                                                                  | 0.1, 0.2                                 | 0.1      |
| Replay length ( $L$ )                         | .                                                                                  | 64                                       | 64       |
| IS target parameter ( $J_{target}$ )          | .                                                                                  | .                                        | 0.0001   |
| Initial IS weighting factor ( $\alpha_{IS}$ ) | .                                                                                  | .                                        | 1        |

Table A.1: Hyper-parameter setting of PPO, PPO-AMBER, and DISC

| <b>Mujoco</b>            | State dim. | Action dim. |
|--------------------------|------------|-------------|
| Ant-v1                   | 111        | 8           |
| HalfCheetah-v1           | 17         | 6           |
| Hopper-v1                | 11         | 3           |
| Humanoid-v1              | 376        | 17          |
| HumanoidStandup-v1       | 376        | 17          |
| Walker2d-v1              | 17         | 6           |
| <b>Box2d</b>             | State dim. | Action dim. |
| BipedalWalker-v2         | 24         | 4           |
| BipedalWalkerHardcore-v2 | 24         | 4           |

Table A.2: The dimensions of state and action spaces of OpenAI GYM continuous control tasks

## B. Ablation Study on More Tasks

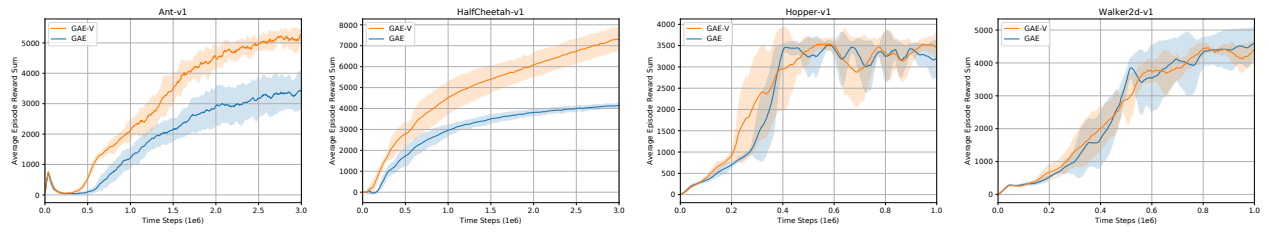

Figure B.1: GAE-V versus GAE

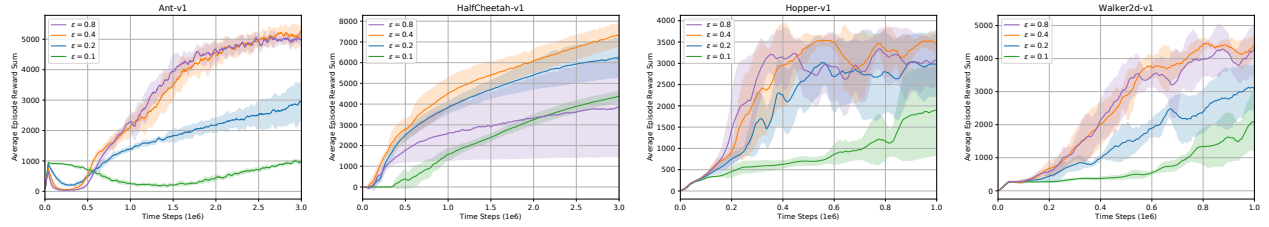

Figure B.2: Impact of the clipping factor  $\epsilon$

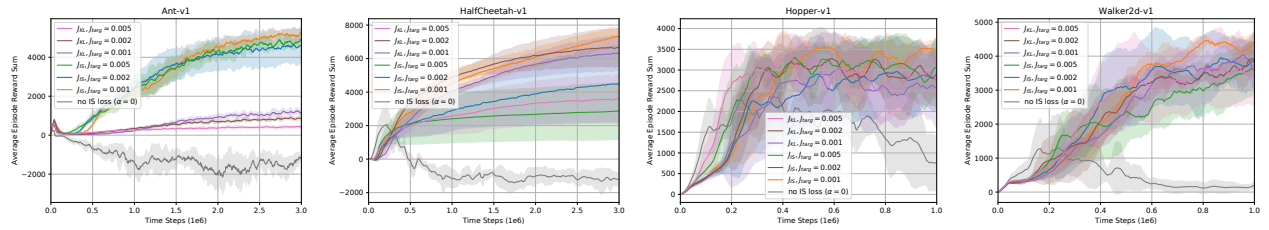

Figure B.3: Impact of the IS loss term  $J_{IS}$  target factor  $J_{targ}$

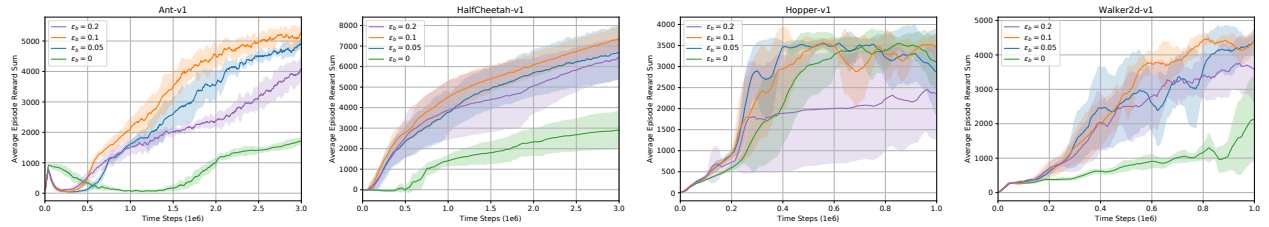

Figure B.4: Impact of the batch inclusion parameter  $\epsilon_b$

## C. Learning Curves of DISC and Other State-of-the-Art RL Algorithms

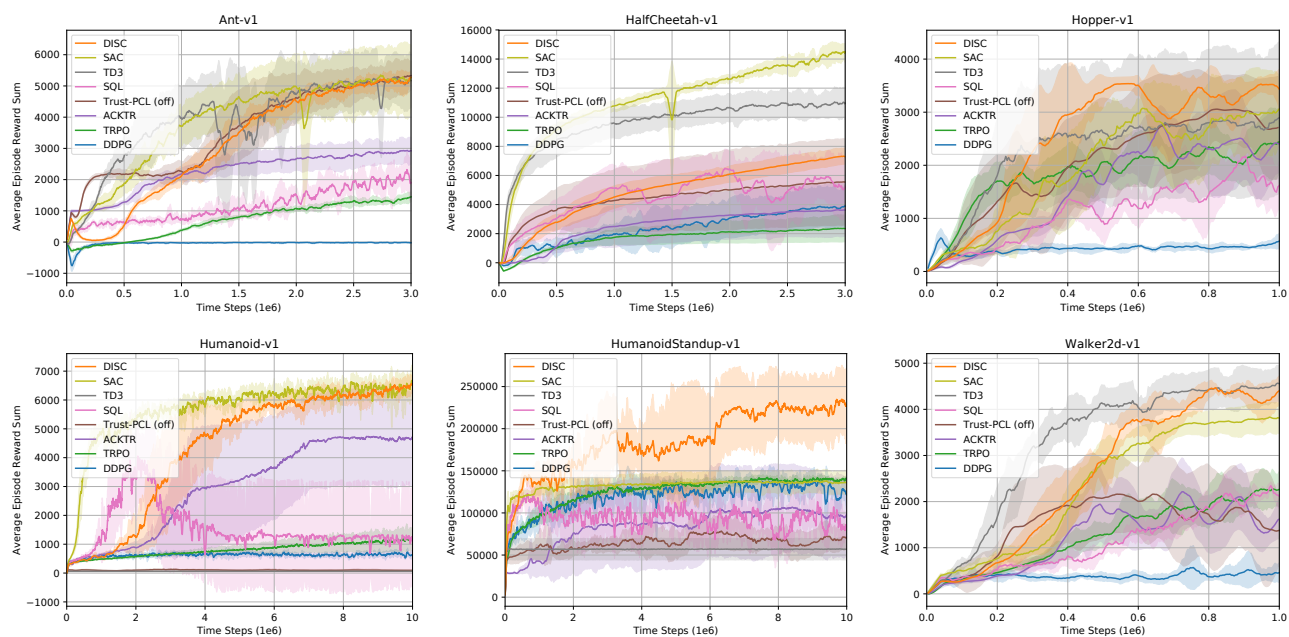

Figure C.1: Learning Curves of DISC and Other State-of-the-Art RL Algorithms on Mujoco tasks
